# Supplementary material for: Phosphate functionalized CoS nanoparticles coupled with Fe2O3nanocrystals decorated on N,S co-doped porous carbon spheres for advanced hybrid supercapacitors
Source: Royal Society of Chemistry journal article supplement (doi:10.1039/d2qi02003c), 2022-11-19
Supplement: d2qi02003c1.pdf [file d2qi02003c1.pdf]

Electronic Supplementary Information (ESI) for

**Phosphate functionalized CoS nanoparticles coupled with  
Fe<sub>2</sub>O<sub>3</sub> nanocrystals decorated on N, S co-doped porous  
carbon spheres for advanced hybrid supercapacitors**

Zhenyuan Ji,<sup>a,\*</sup> Guanxiang Tang,<sup>a</sup> Dongwei Ma,<sup>a</sup> Lizhi Chen,<sup>a</sup>

Guoxing Zhu,<sup>a</sup> Jun Zhu<sup>b</sup> and Xiaoping Shen<sup>a,\*</sup>

<sup>a</sup> *School of Chemistry and Chemical Engineering, Jiangsu University, Zhenjiang  
212013, People's Republic of China*

<sup>b</sup> *Faculty of Transportation Engineering, Huaiyin Institute of Technology, Huai'an  
223003, People's Republic of China*

\* Corresponding author.

*E-mail address:* jizhenyuan@ujs.edu.cn (Zhenyuan Ji), shenxp@ujs.edu.cn (Xiaoping  
Shen)

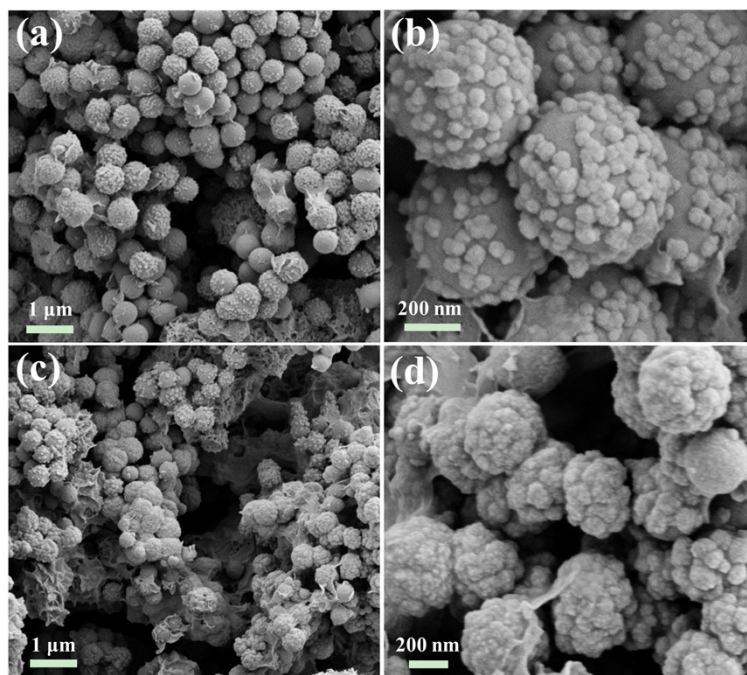

**Fig. S1** SEM images of (a, b) NSC/CoS-1 and (c, d) NSC/CoS-3 composites.

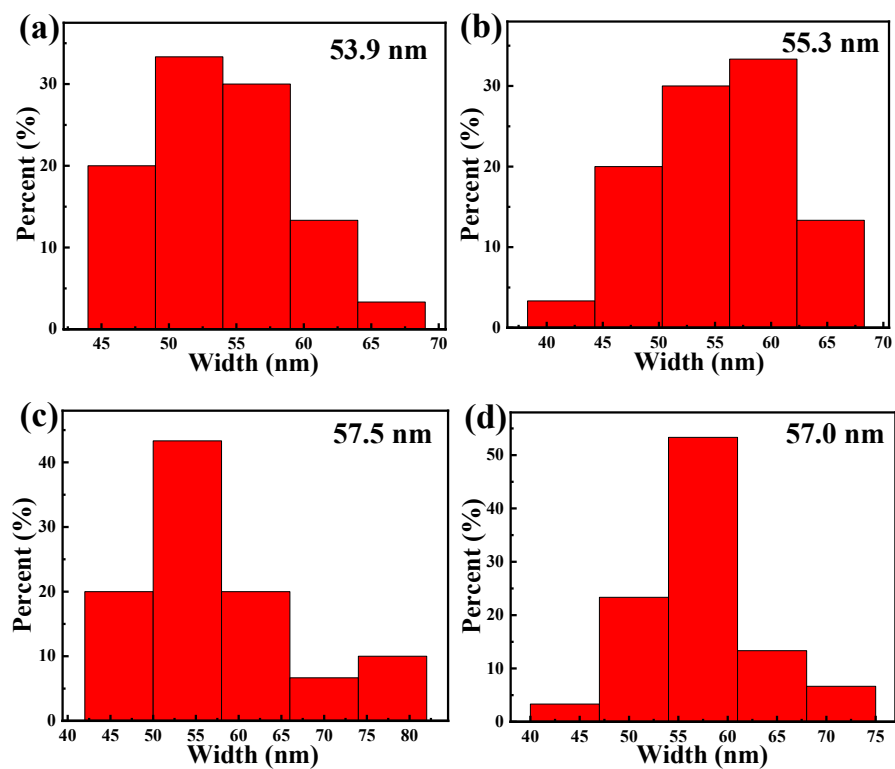

**Fig. S2** The width distributions of (a) NSC/CoS-1, (b) NSC/CoS-2, (c) NSC/CoS-3, and (d) P-NSC/CoS-2.

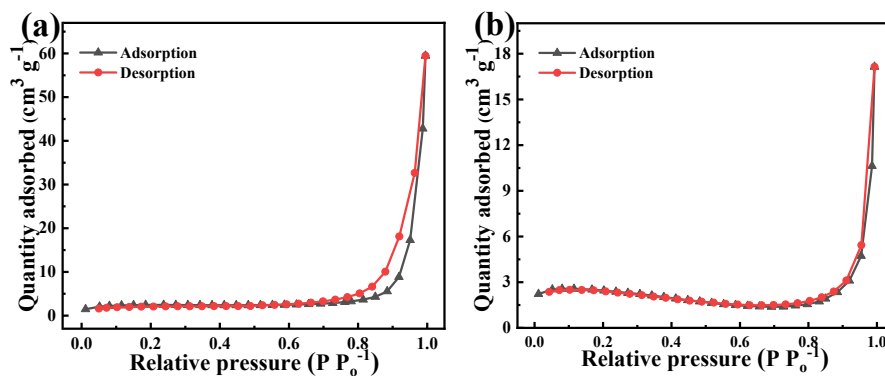

**Fig. S3** (a) The nitrogen adsorption/desorption isotherms of P-NSC/CoS-2 and NSC/Fe<sub>2</sub>O<sub>3</sub>-2.

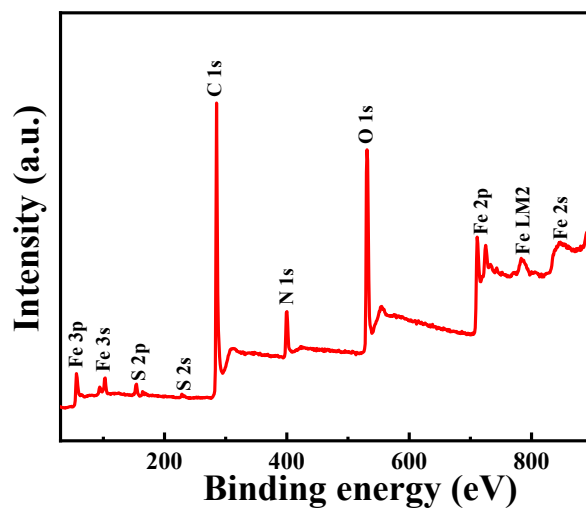

**Fig. S4** XPS survey spectrum of the NSC/Fe<sub>2</sub>O<sub>3</sub>-2 composite.

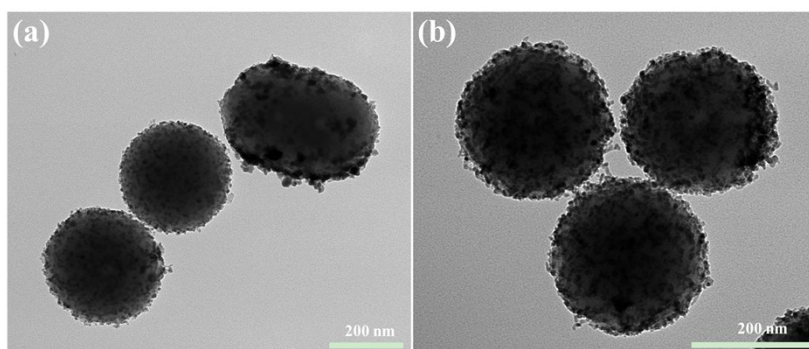

**Fig. S5** TEM images of (a) NSC/Fe<sub>2</sub>O<sub>3</sub>-1 and (b) NSC/Fe<sub>2</sub>O<sub>3</sub>-3 composites.

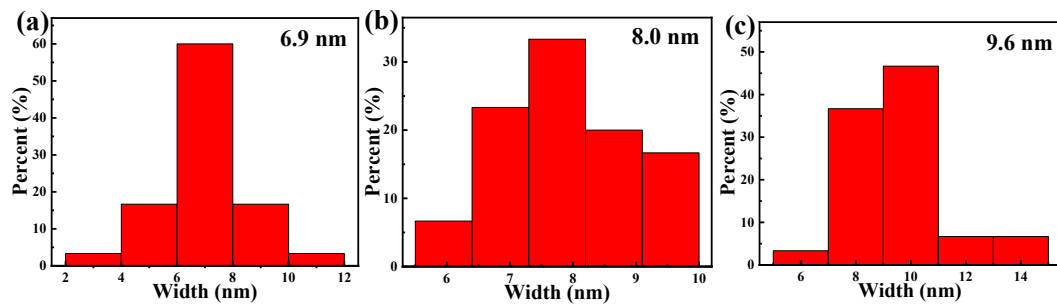

**Fig. S6** The width distributions of (a) NSC/Fe<sub>2</sub>O<sub>3</sub>-1, (b) NSC/Fe<sub>2</sub>O<sub>3</sub>-2, and (c) NSC/Fe<sub>2</sub>O<sub>3</sub>-3.

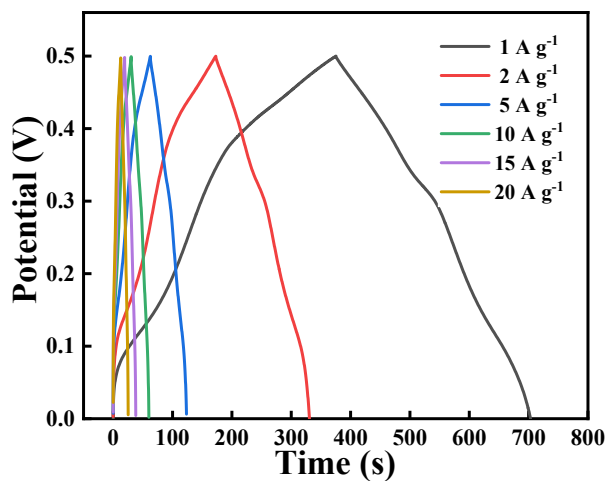

**Fig. S7** GCD profiles of NSC/CoS-2 at 1-20 A g<sup>-1</sup>.

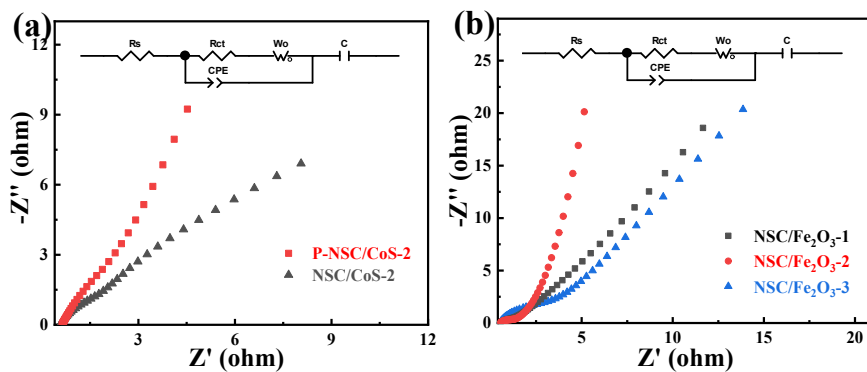

**Fig. S8** Nyquist plots of the electrodes.

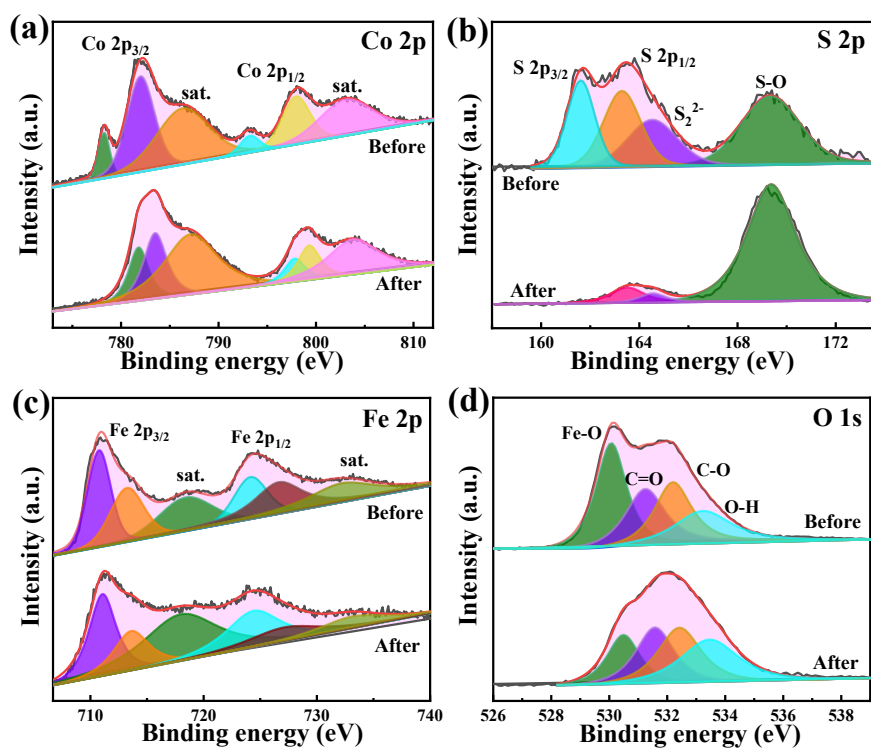

**Fig. S9** (a) Co 2p and (b) S 2p of P-NSC/CoS-2 before and after the electrochemical tests; (c) Fe 2p and (d) O 1s of NSC/Fe<sub>2</sub>O<sub>3</sub>-2 before and after the electrochemical tests.

**Table S1** A comparison of the P-NSC/CoS-2//NSC/Fe<sub>2</sub>O<sub>3</sub>-2 hybrid supercapacitor with those of advanced supercapacitors recently reported.

| Supercapacitor devices                                                       | Energy density<br>(Wh kg <sup>-1</sup> ) | Power density<br>(W kg <sup>-1</sup> ) | Cyclic stability             | Ref.      |
|------------------------------------------------------------------------------|------------------------------------------|----------------------------------------|------------------------------|-----------|
| CoP-CoNC/CC//AC                                                              | 39.2                                     | 1962                                   | 86.5%, 5 A g <sup>-1</sup>   | 1         |
|                                                                              | 30                                       | 9800                                   | 5000 cycles                  |           |
| NiCoP@CoS/NF//AC                                                             | 35.8                                     | 748.9                                  | 91.4%, 10 A g <sup>-1</sup>  | 2         |
|                                                                              | 28.5                                     | 7489.1                                 | 5000 cycles                  |           |
| Zn-Co-O@CoS//NOPC                                                            | 56.8                                     | 771.6                                  | 86.4%, 5 A g <sup>-1</sup>   | 3         |
|                                                                              | 22.2                                     | 7985.7                                 | 5000 cycles                  |           |
| C, N-Co <sub>x</sub> S <sub>y</sub> /CNF//AC                                 | 37.29                                    | 813.6                                  | 90.5%, 10 A g <sup>-1</sup>  | 4         |
|                                                                              | 29                                       | 9546                                   | 5000 cycles                  |           |
| MnO <sub>2-x</sub> @CoS//NOPC                                                | 34.72                                    | 597.24                                 | 89.6%, 4 A g <sup>-1</sup>   | 5         |
|                                                                              | 12.73                                    | 5950                                   | 9000 cycles                  |           |
| CoS@CC//RGO                                                                  | 38                                       | 533                                    | —                            | 6         |
|                                                                              | 24                                       | 5333                                   | 5000 cycles                  |           |
| Fe-Co-S/NF//RGO                                                              | 43.6                                     | 770                                    | 89.6%, 5 A g <sup>-1</sup>   | 7         |
|                                                                              | 13.3                                     | 5510                                   | 5000 cycles                  |           |
| FG-CoS//FG-CoS                                                               | 35.2                                     | 250                                    | 117%, 200 mV s <sup>-1</sup> | 8         |
|                                                                              | 16.82                                    | 1250                                   | 1000 cycles                  |           |
| Co-Zn-S@CuO-CF//Fe-S/GO-NF                                                   | 25.71                                    | 404                                    | 80%, 1.05 A g <sup>-1</sup>  | 9         |
|                                                                              | 8                                        | 8730                                   | 4500 cycles                  |           |
| Co <sub>3</sub> O <sub>4</sub> /NiO/rGO//Fe <sub>2</sub> O <sub>3</sub> /RGO | 37.83                                    | 750                                    | 86.9%, 1 A g <sup>-1</sup>   | 10        |
|                                                                              | —                                        | —                                      | 6000 cycles                  |           |
| P-NSC/CoS-2//NSC/Fe <sub>2</sub> O <sub>3</sub> -2                           | 64.3                                     | 873.6                                  | 94.2%, 5 A g <sup>-1</sup>   | This work |
|                                                                              | 33.3                                     | 16216.2                                | 10000 cycles                 |           |

## References

- 1 V. Elayappan, P. A. Shinde, G. K. Veerasubramani, S. C. Jun, H. S. Noh, K. Kim, M. Kim, H. Lee, Metal-organic-framework-derived hierarchical Co/CoP-decorated nanoporous carbon polyhedra for robust high-energy storage hybrid supercapacitors, *Dalton Trans.*, 2020, **49**, 1157-1166.
- 2 Z. Y. Xu, C. C. Du, H. K. Yang, J. L. Huang, X. H. Zhang and J. H. Chen, NiCoP@CoS tree-like core-shell nanoarrays on nickel foam as battery-type electrodes for supercapacitors, *Chem. Eng. J.*, 2020, **421**, 127871.
- 3 Y. He, L. Xie, S. X. Ding, Y. J. Long, X. Y. Zhou, Q. Hu and D. M. Lin, Core-shell nanostructured Zn-Co-O@CoS arrays for high-performance hybrid supercapacitors, *Dalton Trans.*, 2021, **50**, 4923-4931.
- 4 W. J. Liu, Y. Zhao, J. H. Zheng, D. Y. Jin, Y. Q. Wang, J. B. Lian, S. L. Yang, G. C. Li, Y. F. Bu and F. Qiao, Heterogeneous cobalt polysulfide leaf-like array/carbon nanofiber composites derived from zeolite imidazole framework for advanced asymmetric supercapacitors, *J. Colloid Interface Sci.*, 2022, **606**, 728-735.
- 5 Q. Hu, M. G. Tang, M. He, N. Jiang, C. G. Xu, D. M. Lin and Q. J. Zheng, Core-shell MnO<sub>2</sub>@CoS nanosheets with oxygen vacancies for high-performance supercapattery, *J. Power Sources*, 2019, **446**, 227335.
- 6 S. Surendran, S. Shanmugapriya, H. Ramasamy, G. Janani, D. Kalpanad, Y. S. Lee, U. Sim and R. K. Selvan, Hydrothermal deposition of CoS nanostructures and its multifunctional applications in supercapattery and water electrolyzer, *Appl. Surf. Sci.*, 2019, **494**, 916-928.
- 7 K. Le, M. J. Gao, W. Liu, J. R. Liu, Z. Wang, F. L. Wang, V. Murugadoss, S. D. Wu, T. Ding and Z. H. Guo, MOF-derived hierarchical core-shell hollow iron-cobalt sulfides nanoarrays on Ni foam with enhanced electrochemical properties for high energy density asymmetric supercapacitors, *Electrochim. Acta*, 2019, **323**, 134826.

- 8 D. M. El-Gendy, I. M. Afifi and N. K. Allam, Eco-friendly, one-step synthesis of cobalt sulfide-decorated functionalized graphene for high-performance supercapacitors, *J. Energy Storage*, 2019, **24**, 100760.
- 9 M. Shahi, F. Hekmat and S. Shahrokhian, Hybrid supercapacitors constructed from double-shelled cobalt-zinc sulfide/copper oxide nanoarrays and ferrous sulfide/graphene oxide nanostructures, *J. Colloid Interface Sci.*, 2021, **585**, 750-763.
- 10 M. A. Nassar, S. I. El-dek, W. M. A. El Rouby and A. G. El-Deen, Highly efficient asymmetric supercapacitor-based on Ni-Co oxides intercalated graphene as positive and Fe<sub>2</sub>O<sub>3</sub> doped graphene as negative electrodes, *J. Energy Storage*, 2021, **44**, 103305.
